# Supplementary material for: Temporal sorting of microdroplets can identify productivity differences of itaconic acid from libraries of Yarrowia lipolytica
Source: Royal Society of Chemistry journal article supplement (doi:10.1039/d3lc00020f), 2023-01-01
Supplement: d3lc00020f1.pdf [file d3lc00020f1.pdf]

## Supplementary Information

### Table of Contents:

#### Supplementary Figures:

Pg 2: Supplementary Figure 1. *Time course sorting for distinct production phenotype isolation*

Pg 3: Supplementary Figure 2. *Histograms of each biosensor at 12 hour timepoints*

Pg 4: Supplementary Figure 3. *Production Curves of Populations from Each Sort*

Pg 5: Supplementary Figure 4. *Fluorescent curves obtained from microdroplet encapsulation of top performing isolates*

#### Supplementary Tables:

Pg 6: Supplementary Table 1: *Primers used for TAIL PCR of isolate Piggybac insertions*

#### Supplementary Appendix:

Pg 7: Supplementary Data: *Sequencing data of identified gene perturbations*

## Supplementary Figures:

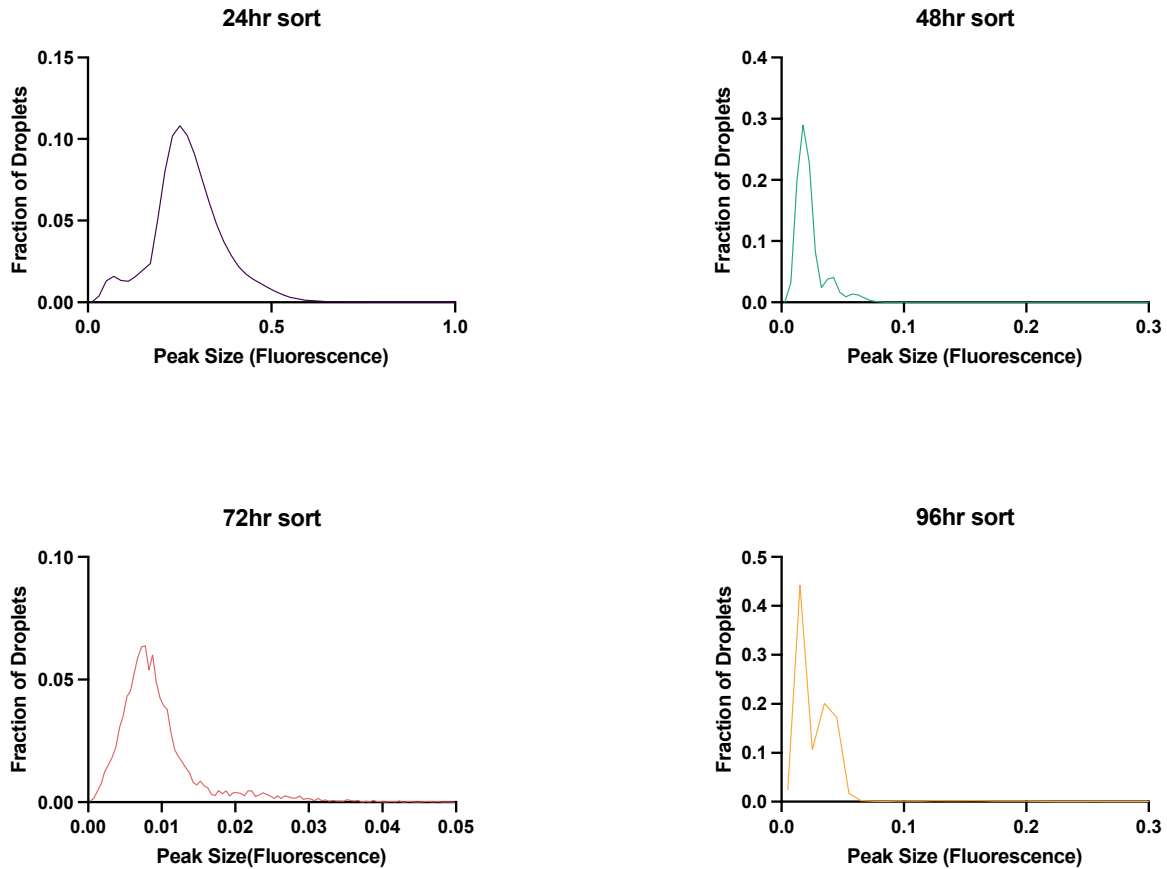

**Supplementary Figure 1:** *Time course sorting for distinct production phenotype isolation.* Emulsions were generated and incubated at 28°C at 24-hour intervals. Sorts were carried out after their corresponding incubation times, and the top 10% of droplets were collected based on overall fluorescence, graphed here. Peak size/fluorescence are not comparable sample-to-sample as gain and laser strength were adjusted to account for signal strength. The 24-hour sample had to be iteratively sorted for a total of two sorts in order to achieve statistically significant differences between the unsorted and sorted population. This histogram represents that collected from the second sort, thus is not a full representation of an unsorted library at 24 hours.

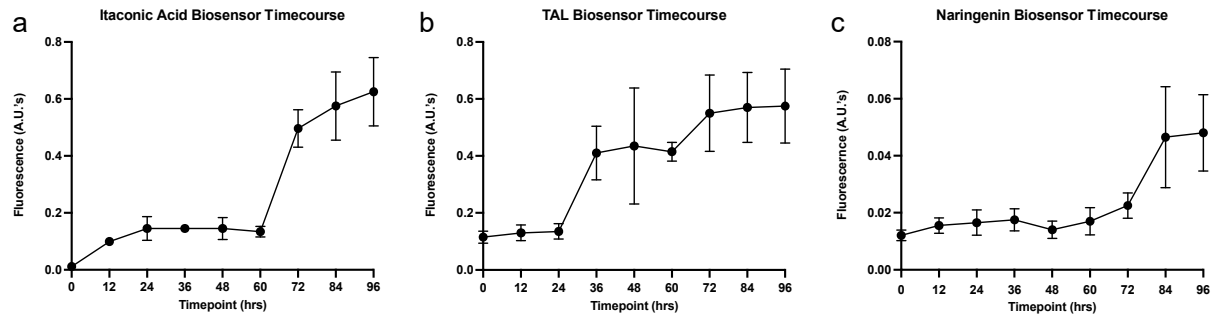

**Supplementary Figure 2:** Response curves of each biosensor at 12 hour timepoints. Previously-characterized production strains of *Y. lipolytica* were co-encapsulated with corresponding *E. coli* biosensors for the production of Itaconic Acid (a), Triacetic acid lactone(b), and Naringenin(c). Emulsions were subsequently incubated and run on the droplet sorting instrument (Sphere Fluidics) to collect fluorescence information from droplets at each time point. droplet loading was 0.1 cells/droplet for *Y. lipolytica* and 10 cells/droplet for *E. coli* to reduce co-encapsulation of producers as modeled via the *Poisson distribution*. Therefore, only the top 10% of droplets represent those containing both the producer strain as well as the biosensor, resulting in a dose-based response.

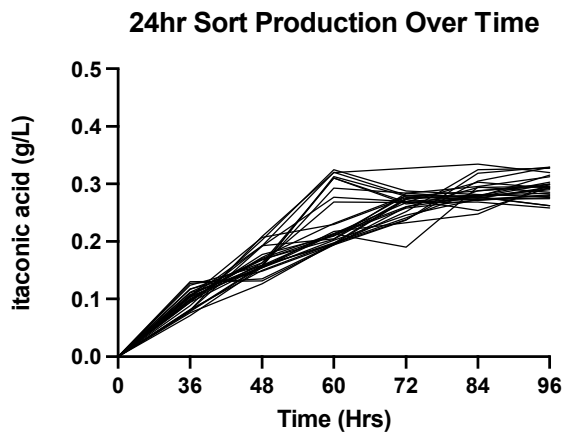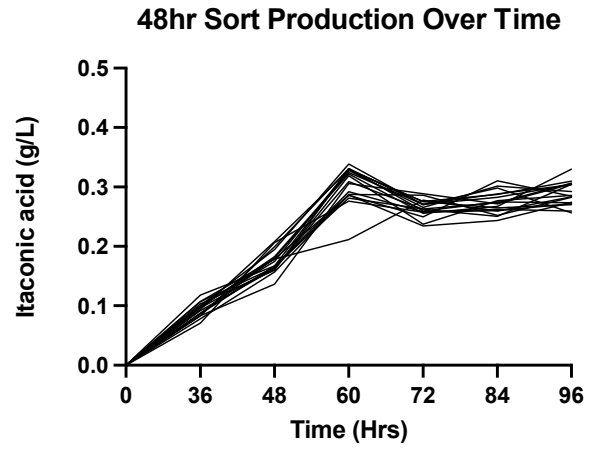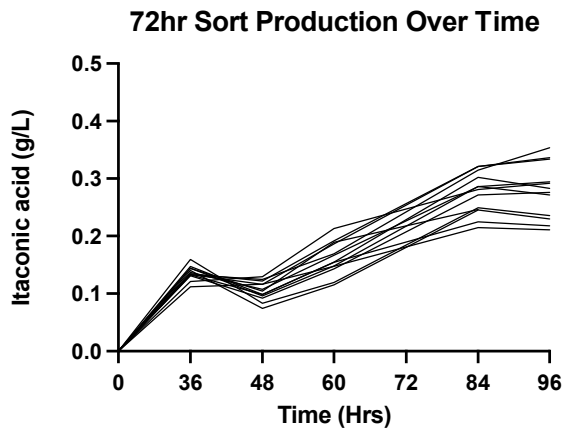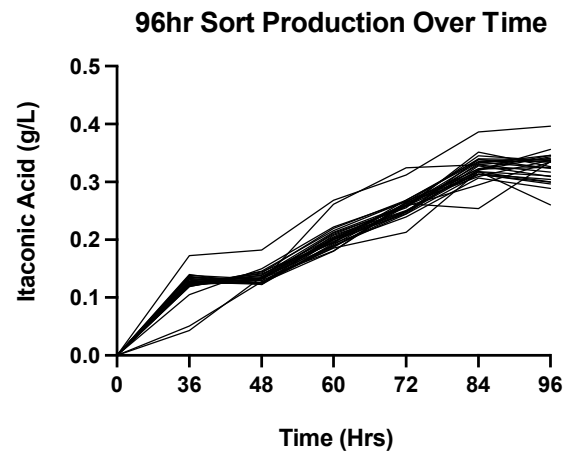

**Supplementary Figure 3: Production Curves of Populations from Each Sort.** Top performing isolates from each sort were cultured for a total of 96 hours with itaconic acid production and OD sampled every 12 hours. a) Production curves of the 24- and 48-hour isolated population over time. Early sort timepoints (24 and 48) show a clear peak in production at the 60-hour timepoint followed by a plateau. b) Isolates sorted at late timepoints (72 and 96) show a slow increase in production that peaks at the 84-hour timepoint.

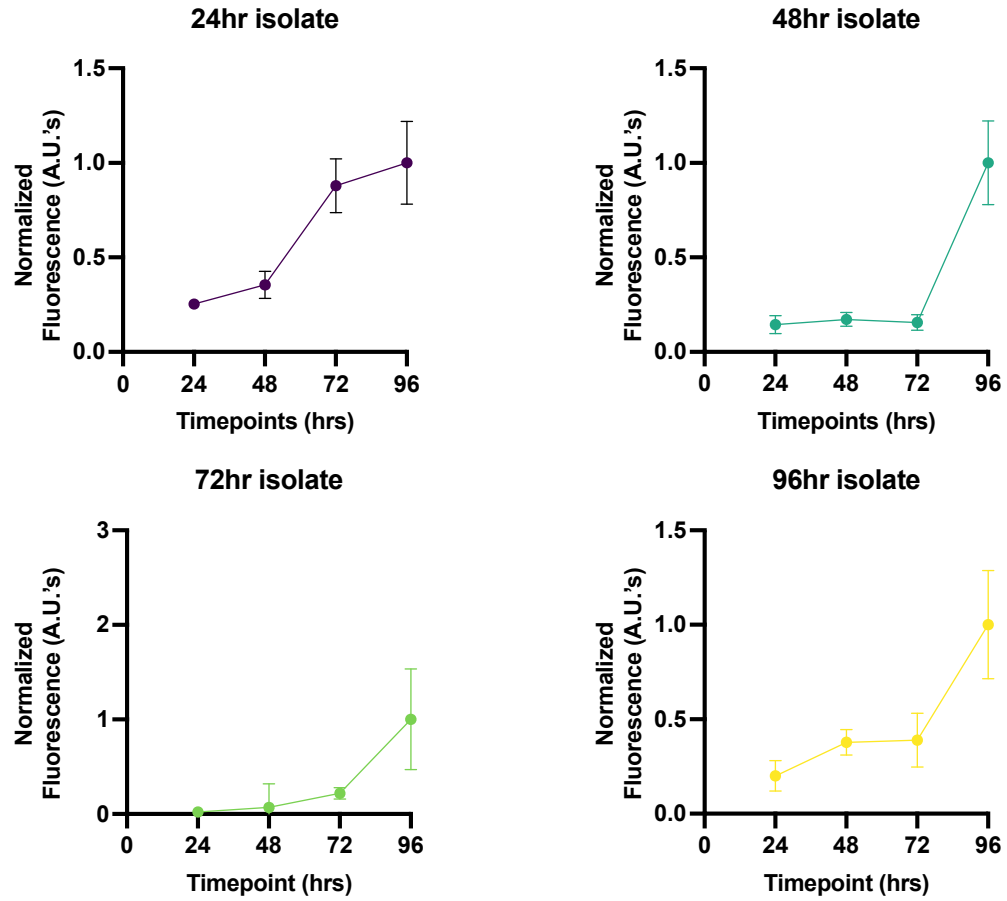

**Supplementary Figure 4:** *Fluorescent curves obtained from microdroplet encapsulation of top performing isolates.* Best-performing isolates from each sort were re-encapsulated with itaconic acid biosensor. Fluorescent measurements were obtained via our FADS system and plotted.

### Supplementary Tables:

| Primer Name | Sequence                   |
|-------------|----------------------------|
| CP215       | AGATGTCCTAAATGCACAGCGAC    |
| CP216       | CTCCAAGCGGCGACTGAG         |
| CP217       | CATTGACAAGCACGCCTCAC       |
| CP218       | CTCGATATACAGACCGATAAAACAC  |
| CP219       | CATGATTATCTTTAACGTACGTCACA |
| CP220       | NTGCANTNTGCNGTT            |
| CP221       | NGTCAGNNNGANANGAA          |
| CP222       | NGTGNGANANCANAG            |
| CP223       | TGNGNGANANCANAG            |
| CP224       | AGNGNAGNANCANAGC           |

**Supplementary Table 1:** *Primers used for TAIL PCR of isolate Piggybac insertions.* Nested primers (CP215-219) were identified from Fonager et. al, and Liu et. al (25, 26). Degenerate primers (CP220-224) were identified from Kalyani et. al, (27).

**Supplementary Data 1: Sequencing data of gene perturbations from TAIL PCR.**

Example sequences identified via TAIL PCR and SANGER sequencing. 3' PiggyBac ITR highlighted in pink.

***Ygsy1* perturbation:**

GAAAATGCTCCCAATCTGCCGCCACGAACTGTAATGCAATATGATGCCAATCGTGTATGGTAACTG  
ATTATGCAGCTCATCACGGCTCCTATAAAGGCAACAGCTCCCAAATTCACAACAAGGCGGCTTTCAATG  
CATCATGGTGTGGTATGTCTAAGTCATCAAGGATCGTTCAATTATTGACGGTAGCTAGATCACTGATGC  
ATTCCATACGAGGAAGACGTCCCCAGCGCCAGAGAAAGAGAGACTGGTATGGAGCTGGGTCAATTATG  
GGTAGACTCTAAGAGCTCCTGCCAGGTTGCAGGCTCTGGGGAAGGGCATTGGAAGAATGTCTAAG  
TCCAAGTTGTCCAGAATGCCAACAGAATATCAGACTAAAATCTGAAGAGTCAATACCGCCAGAATC  
CATGGGAGATGCTCTGGAGGGGTGACAACAGGGCCTGCGCCTGCTGCGGACTCAGCAGACCCGGCCA  
CTGGCCTCACTTCATTTCCCTGGGCTTCCGCCTCTGTTAGCAACCAGAGCATCCATCCGCAAGCGCTG  
TCCAACCTCTGGTTCTCAACTACATGACCAACAGTTTTCTCGAGTAAAAGGTGATTTGTAGCAAAGT  
CTAAGGTTATCATCTTCTCAATCTTCCACGAGATGTTCCAGCTCATTATTGAGCAATCGTTACATCTA  
GGCAGTATGATATGGTATTTTTATTATTTTTAACCAGCGGCGACTGAGGACCCGAAAGCGAGGAGC  
CACTGGAGGAATCATTCTCACCGCTCCCACAACCCGGAGGACCCACCGAGGACTTTGGAATCAAGT  
ACAACCTCGCCAATGGCGGGCCCGCTCCCGAGTCCGTTACCAACAATATTTTCGACGTGACCAACAAG  
ATCAAGGAATACCAGCGAGTCGACGTGGGAGAGGTGACCTCAAGACCGTCGGCACCAAGCAGTACG  
GTCCATTGAGATTGAGATCATTGACTCTGCCGCCGACTACGTCGCTATGATCAAGGATATCTTCGACC  
TGGAGCTCATCAAGGACTTCTCAAGTCCAACCCTGACTTCAAGTCTCTTTGACGGTCTTAACCTA  
GAAAGATAGTCTGCGTAAAATTGACGCATGCATTCTTGAAATATGCTCTCTCTCGATATGCCATGC

***Ypgm1* perturbation:**

NNNNCGGTGTGGAATTCCGNACAAGATNCTAGGAAANNGNATANGNNCATGCCANCAGTGNNACG  
TGGNNGCAATCGGTGGCCTCTCGCCTATAACTGCCAGCTGNNNGGGATTNCTGCAGCGATAGNTGT  
TACGNNGNTTCCAGTCACGACGTGTAACCGACGNNAGTGATCGACATCACAGCTACGAGTCGAGCA  
CTGCTCAGCGAAAGCCCGACGTGTGTGCCACGTCTCACGTGGTCAAGTTTTCGGCATGCACGAGTTCC  
AGACCTGCATGCCCTGATGAAGGACAAGATCAACCAGTTTGTCAAGGGCCACTTTTACGGTCACCTGG  
ACTTTGATCTCGACGACACTCTGTATACCTTTACTGCCGGCCGATACGAGTACCGAAACAAGGGTGT  
GACATGTTTCATCGAGTCTCTCGCCGTCTCAACCACAGATTGAAGAGCGAGAAGTCCGCCAAGACCAT  
TGTGGCCTTTATCATCATGCCCGCCAGACCTCATCATAACAGTGGAGACCCTCAAGGGCCAGGCCGT  
TATGAAGGCTCTGGAGGACACCGTCAACGAAATCCAGCAGCAGATTGGCCGACGAATGCTCGACCA  
TTGTGCCCGCCACAACAGCCACGACGAAAGGAGGTCCCCGGCCTCGACCAGCTGCTTTCCCCCTTTAG  
ATAGTCTTACGCTCAAGCGACGAGTGTGTCCTCAAGCGAGAAACATTCACCCCATTTGTCACCCACA  
ACATGGTGGACGACTCCACAGTCCCCATTCTCAACCAGATCCGACGGGTACAGCTGTTCAACCGGCCC  
GAGGACCGGGTCAAGATTATCTTCCACCCCGAGTTCCTCAACTCCAACAACCTCTCTCCTGCCTCTCGACT  
ACGACGACTTTGTGCGAGGCTGTCATCTCGGAGTCTTCCCCTCTACTACGAGCCTTGGGGATACACCC  
CCGCCGAGTGCACCGTCATGGGCGTTCCTTCCATCACCAACCTCTCTGGTTTCGGCTGCTACATGG  
AGGATCTCATTGAGAACGCCTCCGACTACGGCATCTACATTGTGGACCGTCGTCTCAAGTCTATTGACG  
AGAGTGTAGACCAGTTAACCGACTACATGTTAGATGTCTTCAAGGCACAGCGACGTACGCGAA  
CTTAGAAAGATAGTCTGCGTAAAATTGACGCAGCATTCTTGAAATATGCTCTCTCTTCTAAGTACGATCC
